# Supplementary material
Source: PubMed Central journal article supplement (PMC5864208)

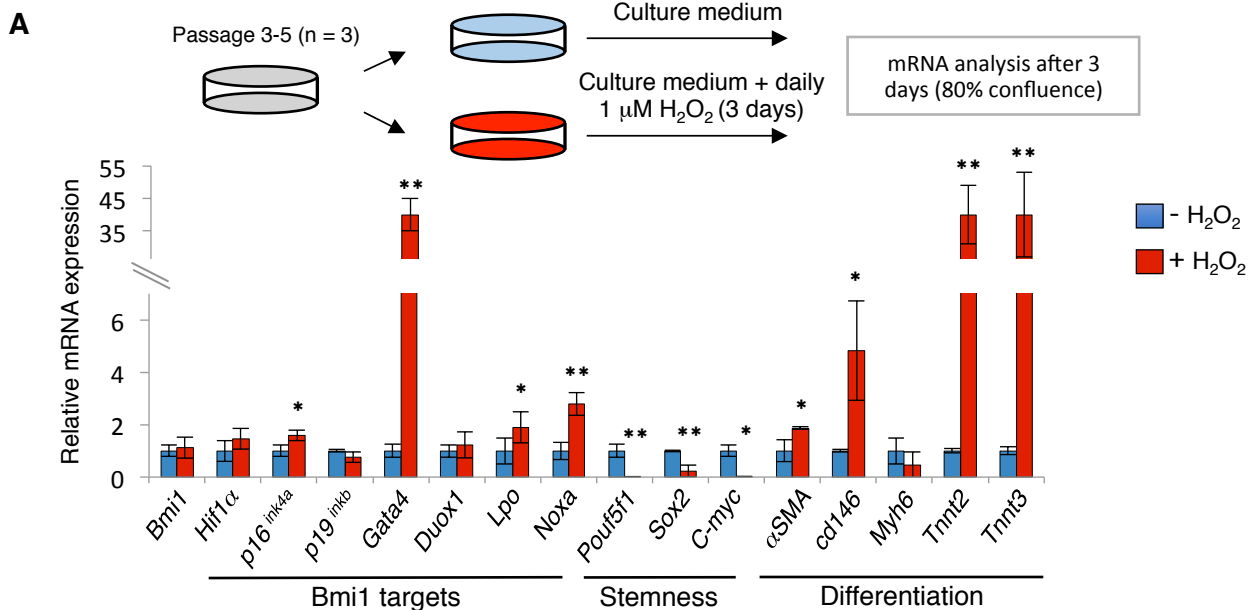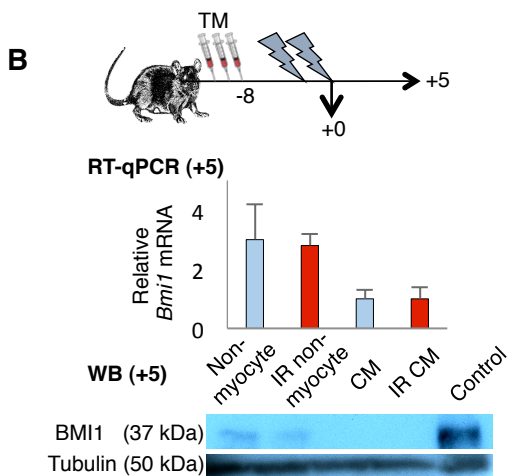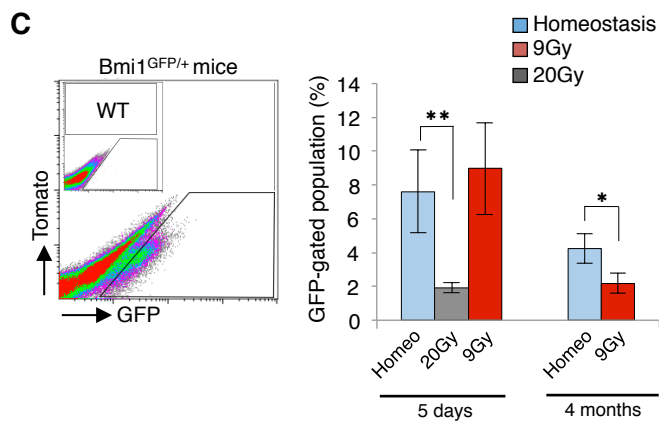

**D**

IPA predicted pathways affected (BMI1)

| Top Canonical Pathways                  |          |               |
|-----------------------------------------|----------|---------------|
| Name                                    | p-value  | Overlap       |
| cAMP-mediated signaling                 | 1.33E-05 | 11.2 % 24/214 |
| G-Protein Coupled Receptor Signaling    | 2.44E-05 | 10.2 % 27/266 |
| nNOS Signaling in Skeletal Muscle Cells | 1.94E-04 | 35.7 % 5/14   |
| Myotrophic Lateral Sclerosis Signaling  | 2.00E-04 | 12.8 % 14/109 |
| Melatonin Signaling                     | 5.41E-04 | 14.7 % 10/68  |

IPA predicted pathways affected (H2Aub)

| Top Canonical Pathways            |          |              |
|-----------------------------------|----------|--------------|
| Name                              | p-value  | Overlap      |
| Axonal Guidance Signaling         | 6.73E-07 | 7.3 % 32/438 |
| Leukocyte Extravasation Signaling | 5.70E-05 | 8.3 % 17/204 |
| Protein Kinase A Signaling        | 1.11E-04 | 6.5 % 24/370 |
| Gap Junction Signaling            | 2.09E-04 | 8.5 % 14/165 |
| G12/13 Signaling                  | 2.17E-04 | 9.4 % 12/127 |

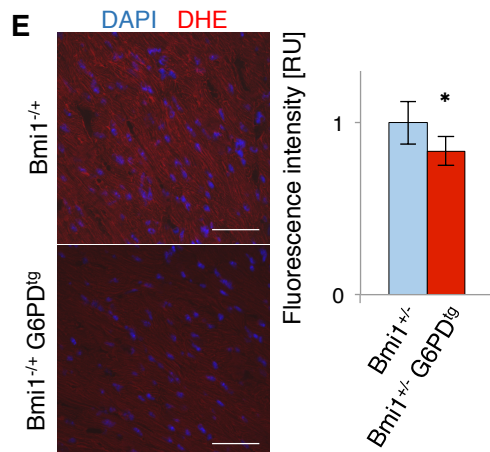

Supplement: 41418_2017_22_MOESM5_ESM.pdf [file 41418_2017_22_MOESM5_ESM.pdf]
