# Supplementary material
Source: PubMed Central journal article supplement (PMC5864208)
Supplement: 41418_2017_22_MOESM6_ESM.pdf [file 41418_2017_22_MOESM6_ESM.pdf]

| Transgenic mouse                        | Stage              | Condition            | Time of Tx induction  | Time of heart analysis | Positive cells | Derived endothelium | Derived smooth muscle | Derived cardiomyocytes |                                   |
|-----------------------------------------|--------------------|----------------------|-----------------------|------------------------|----------------|---------------------|-----------------------|------------------------|-----------------------------------|
| <b>BmiCreERT:<br/>:Rosa26Tomato</b>     | <i>Neonatal</i>    | Homeostasis          | Embryonic day 18.5    | Postnatal day 1 (P1)   | -              | 1.47 %              | 1.7 %                 | 0%                     | [X fold]; relative to homeostasis |
|                                         | <i>Neonatal</i>    |                      |                       | Postnatal day 7 (P7)   | -              | 4.33 % [2.9]        | 6.33 % [3.72]         | 7.5 %                  |                                   |
|                                         | <i>Neonatal</i>    |                      |                       | Postnatal day 14 (P14) | -              | 5.08 % [3.46]       | 7 % [4.12]            | 10.3 %                 |                                   |
| <b>BmiCreERT:<br/>:Rosa26YFP</b>        | <i>Adult</i>       | Homeostasis          | Adult                 | 120 days post-Tx       | -              | 1.17 cell/mm2       | 1.36 cell/mm2         | 0.83 cell/mm2          | [X fold]; relative to homeostasis |
|                                         |                    |                      |                       |                        | -              | -                   | -                     | 4%                     |                                   |
|                                         | <i>Adult</i>       | <b>γ-IR</b>          | 5 days before damage  | 120 days after damage  | -              | 2.9 cell/mm2 [2.48] | 5.19 cell/mm2 [3.82]  | 2.4 cell/mm2 [2.89]    |                                   |
|                                         |                    |                      |                       |                        | -              | -                   | -                     | 13.5 % [3.37]          |                                   |
|                                         | <i>Adult</i>       | <b>Paraquat</b>      | 5 days before damage  | 120 days after damage  | -              | -                   | -                     | 12.3 % [3.07]          |                                   |
| <i>Adult</i>                            | <b>Mitomycin-C</b> | 5 days before damage | 120 days after damage | -                      | -              | -                   | 7.3 % [1.82]          |                        |                                   |
| <i>Adult</i>                            | <b>γ-IR+ NAC</b>   | 5 days before damage | 121 days after damage | -                      | -              | -                   | 7 % [1.75]            |                        |                                   |
| <b>Bmi1GFP</b>                          | <i>Adult</i>       | Homeostasis          | -                     | Adult (6-8 weeks)      | 7.6 %          | -                   | -                     | -                      | [X fold]; relative to homeostasis |
|                                         |                    |                      |                       | Adult (24 weeks)       | 4.23 % [0.55]  | -                   | -                     | -                      |                                   |
|                                         | <i>Adult</i>       | <b>γ-IR (20Gy)</b>   | -                     | 5 days after damage    | 1.93 % [0.25]  | -                   | -                     | -                      |                                   |
|                                         | <i>Adult</i>       | <b>γ-IR (9Gy)</b>    | -                     | 5 days after damage    | 8.96 % [1.18]  | -                   | -                     | -                      |                                   |
|                                         | <i>Adult</i>       |                      | -                     | 120 days after damage  | 2.18 % [0.515] | -                   | -                     | -                      |                                   |
|                                         | <i>Adult</i>       | <b>Paraquat</b>      | -                     | 5 days after damage    | 7.47 % [0.983] | -                   | -                     | -                      |                                   |
| <b>Myh6MerCreMer:<br/>:Rosa26Tomato</b> | <i>Adult</i>       | Homeostasis          | Adult (6-8 weeks)     | 5 days post-Tx         | 3%             | -                   | -                     | -                      | [X fold]; relative to homeostasis |
|                                         | <i>Adult</i>       |                      |                       | 30 days post-Tx        | 1.05 % [0.35]  | -                   | -                     | -                      |                                   |
|                                         | <i>Adult</i>       |                      |                       | 60 days post-Tx        | 0.57 % [0.19]  | -                   | -                     | -                      |                                   |
|                                         | <i>Adult</i>       | <b>Paraquat</b>      | 5 days after paraquat | 5 days post-Tx         | 6.1 % [2.03]   | -                   | -                     | -                      |                                   |
