# Supplementary material
Source: PubMed Central journal article supplement (PMC5864208)
Supplement: 41418_2017_22_MOESM8_ESM.pdf [file 41418_2017_22_MOESM8_ESM.pdf]

## Primary antibodies

| Antigen             | Application (Concentration )         | Reference                |
|---------------------|--------------------------------------|--------------------------|
| <b>CDH5</b>         | IHC-Fr (1:100)                       | MA5-17050 Thermo Fisher  |
| <b>vWF</b>          | IHC-Fr (1:100)                       | Ab11713 abcam            |
| <b>CD146</b>        | IHC-Fr (1:100)                       | Ab75769 abcam            |
| <b>SαA</b>          | IHC-Fr (1:100), ICC (1:100)          | A7732 sigma              |
| <b>αSMA</b>         | IHC-Fr (1:100)                       | A2547 sigma              |
| <b>GFP</b>          | IHC-Fr (1:100) , ICC (1:100)         | 632592 Clontech          |
| <b>YFP</b>          | IHC-Fr (1:100), ICC (1:100)          | AB603 Evrogen            |
| <b>H2K119ub</b>     | ICC (1:100) , IP (1:2000)            | ABE569 Millipore         |
| <b>BMI1</b>         | ICC (1:100), WB (1:100), IP (1:2000) | 05-647 Millipore         |
| <b>HP1</b>          | ICC (1:100)                          | Ab77256 Millipore        |
| <b>α-tubulin</b>    | WB (1:1000)                          | CP06 Millipore           |
| <b>Ly6a</b>         | IHC-Fr (1:100)                       | Ab25196 abcam            |
| <b>53BP1</b>        | ICC (1:100)                          | NB100-304 Novus          |
| <b>c-KIT-biotin</b> | FC (1:50)                            | 553353 BD                |
| <b>CD140a-APC</b>   | FC (1:100)                           | 135907 BioLegend         |
| <b>CD31-biotin</b>  | FC (1:100)                           | 558737 BD                |
| <b>Ly6a-APC</b>     | FC (1:100)                           | 17-5981-83 Thermo Fisher |

IHC-Fr: Immunohistochemistry on frozen sections; ICC: immunocytochemistry;  
WB: Western blot; IP: Immunoprecipitation; FC: flow cytometry

## Primers

| Gene                 | Sequence 5'-3'                                                   |
|----------------------|------------------------------------------------------------------|
| p16 <sup>INK4a</sup> | Fw: CGTACCCCGATTTCAGGTGATG<br>Rv: AGAAGGTAGTGGGGTCTCTCG          |
| p19 <sup>INK4d</sup> | Fw: CACCGGAATCCTGGACCAG<br>Rv: GCAGTTCGAATCTGCACCGT              |
| Noxa                 | Fw: GAACGCGCCAGTGAACCCAA<br>Rv: CTTTGTCTCCAATCCTCCGG             |
| Duox1                | Fw: CTGTACCTCGATGGACCGTTTGGAGA<br>Rv: AGTCCTTGTCAACCAGATGAAGTAGA |
| Alox15               | Fw: GACTTGGCTGAGCGAGGACT<br>Rv: CTTGACACCAGCTCTGCA               |
| Lpo                  | Fw: CTGGACCAGAAGAGATCCATG<br>Rv: TCACCAGGTGGGAACATGATGG          |
| Bmi1                 | Fw: CGCCCGCTCAGATCGCCTC<br>Rv: ACCCTCCACACAGGACACACATT           |
| Ly6a                 | Fw: GGCAGATGGGTAAGCAAAGA<br>Rv: CAATTACCTGCCCTACCCT              |
| Myh6                 | Fw: CTTTCATCCATGGCCAATTCT<br>Rv: AGAAGA ACTTGAGTTACGCG           |

|                    |                                                            |
|--------------------|------------------------------------------------------------|
| Tnnt2              | Fw: ACCCTCAGGCTCAGGTTCA<br>Rv: AGACTTGTCCCTGACGTGTG        |
| Hif1- $\alpha$     | Fw: GTCGGACAGCCTCACCAAACAG<br>Rv: TAGGTAGTGAGCCACCAGTGTCC  |
| Gata4              | Fw: CACCTGTTGTGCAAATTTGTCAGA<br>Rv: GGATCCCTTCCTTCTTCATGGT |
| Pou5f1             | Fw: TCTTCTGCTTCAGCAGCTTG<br>Rv: AACCAAGGTGGAAGAGGTTG       |
| Sox2               | Fw: AAAGCGTTAATTTGGATGGG<br>Rv: TGGGGAGGGTTAAGAGAACA       |
| C-myc              | Fw: TGAAGTTCACGTTGAGGGG<br>Rv: AGAGCTCCTCGAGCTGTTTG        |
| Nestin             | Fw: CCCTGAAGTCGAGGAGCTG<br>Rv: CTGCTGCACCTCTAAGCGA         |
| $\alpha$ SMA       | Fw: CTGACAGAGGCACCACTGAA<br>Rv: CATCTCCAGAGTCCAGCACA       |
| cd146              | Fw: AGGACCTTGAGTTTGAGTGG<br>Rv: CAGTGGTTTGGCTGGAGT         |
| Tnnt3              | Fw: TCCGGGATCTTAGGAGCAGT<br>Rv: GAACAAGTTGAGGAGGAGGC       |
| Collagen1 $\alpha$ | Fw: TGAAGTTCGAGGAGCTG<br>Rv: GTTCGGGCTGATGTACCAGT          |
| s100a              | Fw: TTTGTGGAAGGTGGACACAA<br>Rv: CAGCACTTCCTCTCTCTTGG       |
| Cdh5               | Fw: TCATCAAACCCACGAAGTCC<br>Rv: GGTCTGTGGCCTCAATGTAGA      |
| cd31               | Fw: AGTTCGCTGCCATTCATCAC<br>Rv: ACCCTCCACACAGGACACACATT    |
| Tie2               | Fw: TTTCGGCATCAGACACAAGA<br>Rv: CCGGCTTAGTTCTCTGTGGA       |
| cd34               | Fw: TGAAAAAGCTGGGGATCCT<br>Rv: TCCCAGGTCTGAGCTATA          |
| Kdr                | Fw: AGAACACCAAAAGAGAGAGGAACG<br>Rv: GCACACAGGCAGAAACCAGTAG |
| Vegfa              | Fw: AAGGAGGAGGGCAGAATCAT<br>Rv: ATCTGCATGGTGATGTTGGA       |
| vWF                | Fw: CCGTCTTCAGTAGCTGGCAT<br>Rv: GTGTAAACGGGCATCTCCTC       |
| Nkx2.5             | Fw: GACAAAGCCGAGACGGATGG<br>Rv: CTGTGCTTGCACTTGTAGC        |
| Myh6               | Fw: ATCCCTCAAACGTGCAGGAG<br>Rv: AAGGTCAGCAGGAGCCAATC       |
| Tbx20              | Fw: AAACCCCTGGAACAATTTGTGG<br>Rv: CATCTCTTCGCTGGGGATGAT    |
| Mef2c              | Fw: CCCTCAGTCAGTTGGGAGCTTGC<br>Rv: CTCGAAGGGGTGGTGGTACGGT  |
| Tpm2               | Fw: TTTGCAAGGCTGTAGCCAG<br>Rv: AAGGATGCCCAGGAGAAACT        |

|                       |                                                          |
|-----------------------|----------------------------------------------------------|
| GusB                  | Fw: ACTCCTCACTGAACATGCGA<br>Rv: ATAAGACGCATCAGAAGCCG     |
| Gadph                 | Fw: AGGTCGGTGTGAACGGATTTG<br>Rv: TGTAGACCATGTAGTTGAGGTCA |
| Gata4<br>(ChIP)       | Fw: CGAAACTGTAGGATGAACAC<br>Rv: GTGAAATCCAACATCTGC       |
| Nkx2.5<br>(ChIP)      | Fw: GATAAGATGACATACCAGAGC<br>Rv: GTCTCTCGGCAAGAAG        |
| Neg Control<br>(ChIP) | Fw: GTATGGTGAAGACAACGCAC<br>Rv: CTGCTTGGAGGGTAAGCAC      |
| Tbx20<br>(ChIP)       | Fw: GTCCCGATCTCCACGTGTGG<br>Rv: GAGCGGTGGCTGAGCTCAG      |
| Hoxb8<br>(ChIP)       | Fw: GGGCAGTCCGGGAGTATC<br>Rv: GGAGGTAGGTGTTTGGAAACG      |
| Foxa1<br>(ChIP)       | Fw: CCAGGAAGAGTCAAGGATCAA<br>Rv: CTA ACTTCGGGTGCAGTCC    |
| Ink4a (ChIP)          | Fw: CTGTTTCAACTCCCAGCTCTC<br>Rv: GATGGAGCCCGGACTACAGAAG  |

**GEO accession number:** GSE92700

**GEO url:**

<https://www.ncbi.nlm.nih.gov/geo/query/acc.cgi?token=ihkvqmicxvcrrah&acc=GSE92700>
