# Supplementary material
Source: PubMed Central journal article supplement (PMC5864208)

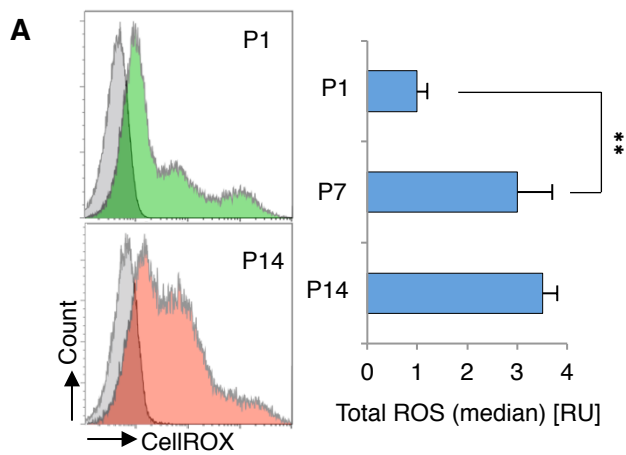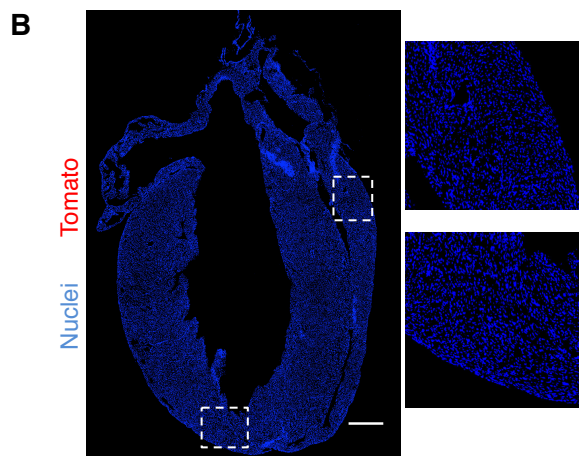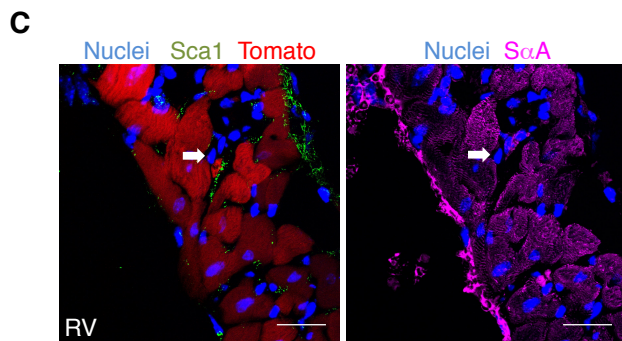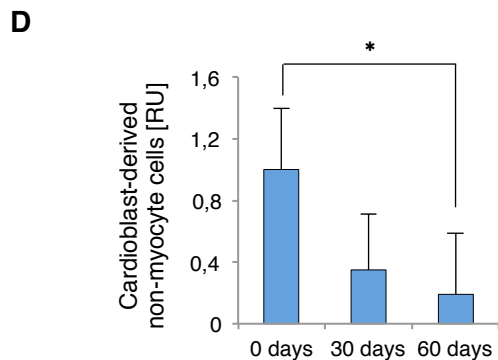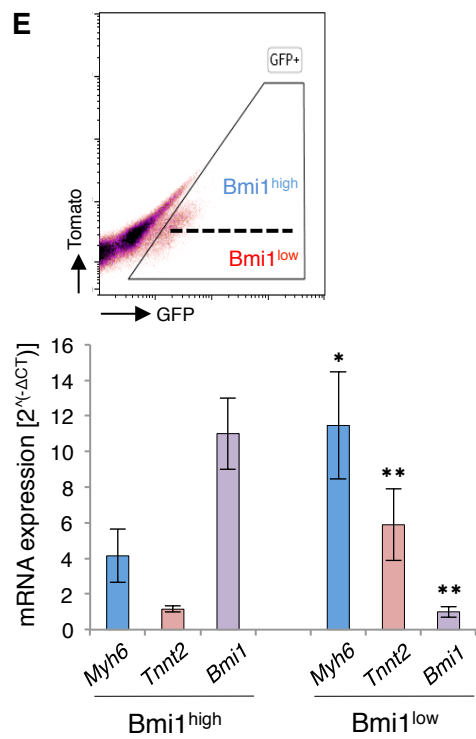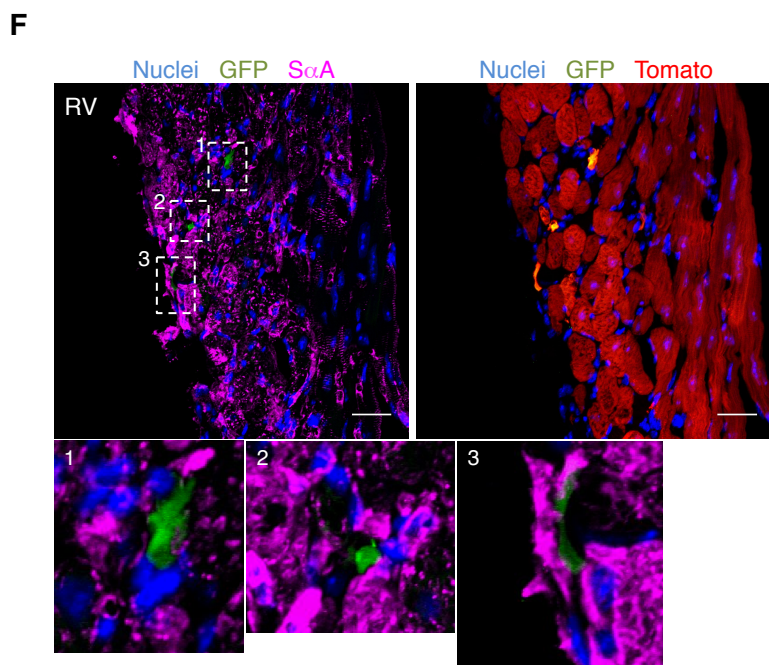

Supplement: 41418_2017_22_MOESM1_ESM.pdf [file 41418_2017_22_MOESM1_ESM.pdf]

Myh6<sup>MerCreMer/+</sup>R26<sup>Tomato/+</sup>  
Bmi1<sup>GFP/+</sup>

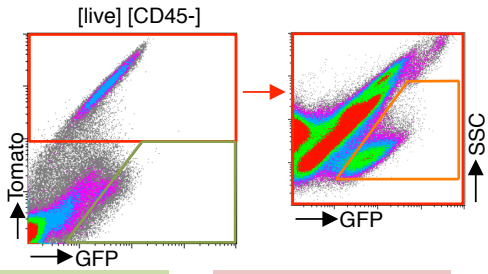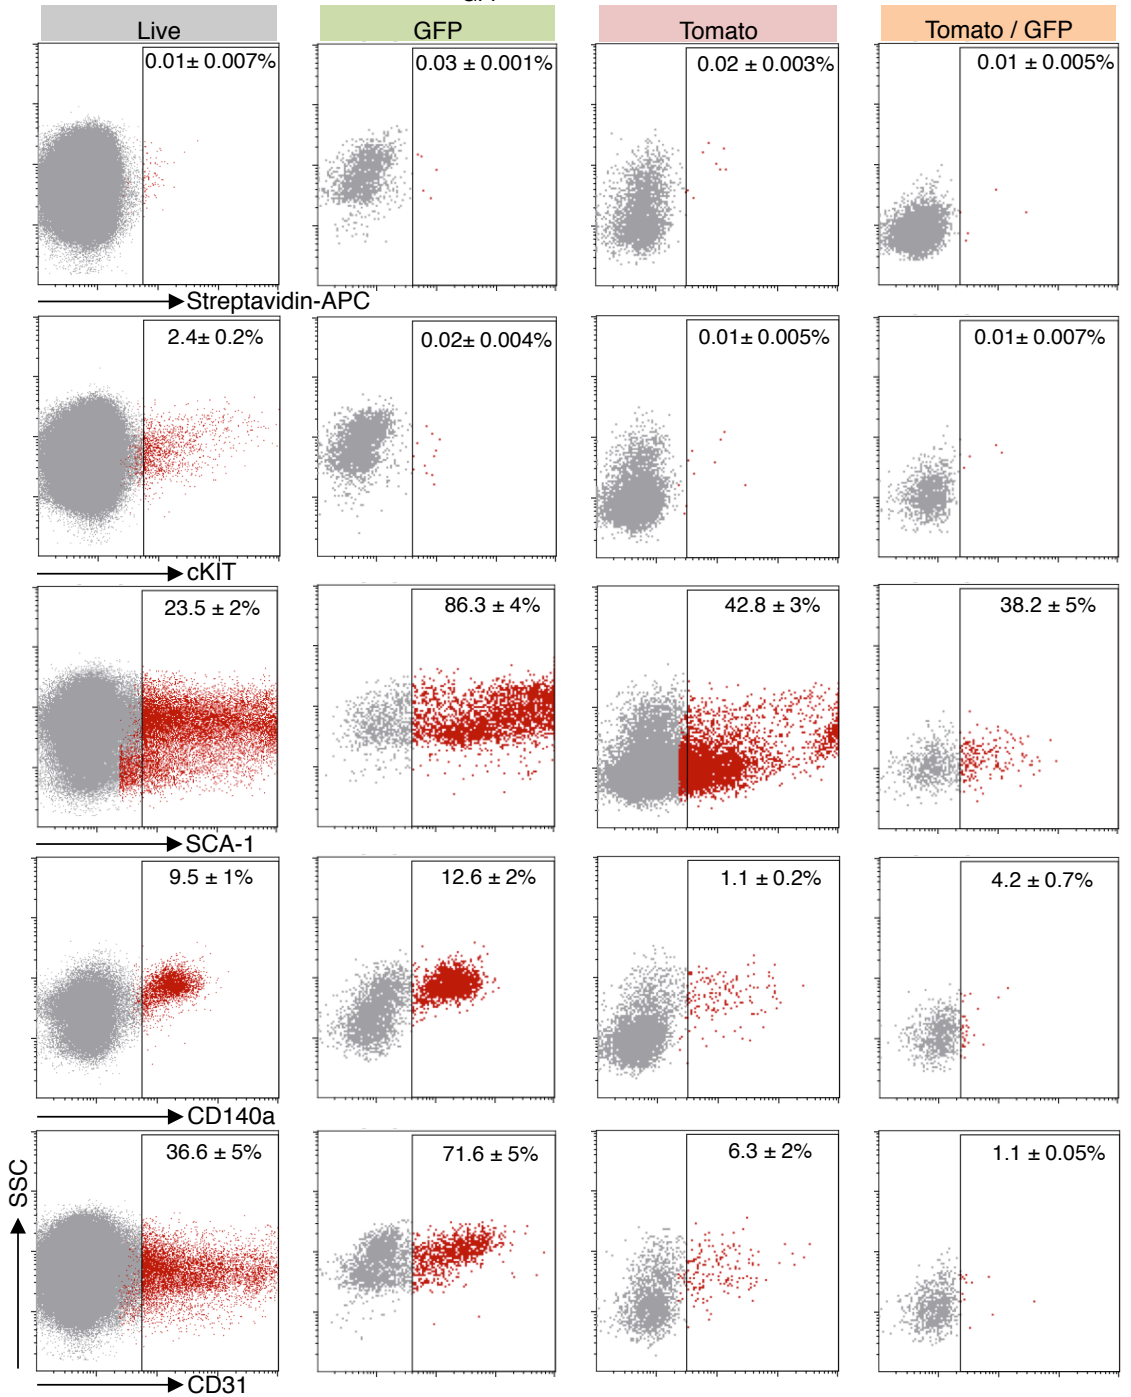

Supplement: 41418_2017_22_MOESM2_ESM.pdf [file 41418_2017_22_MOESM2_ESM.pdf]

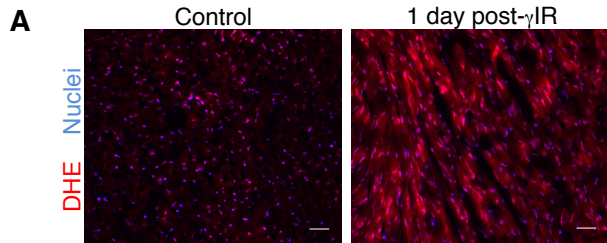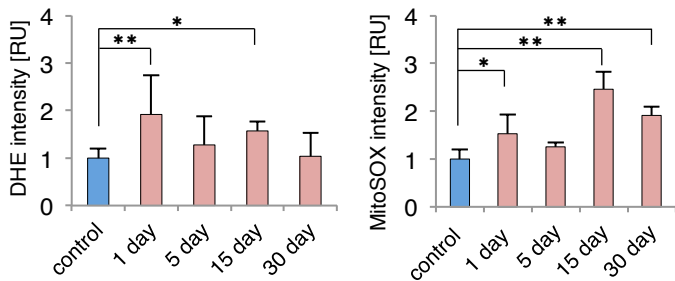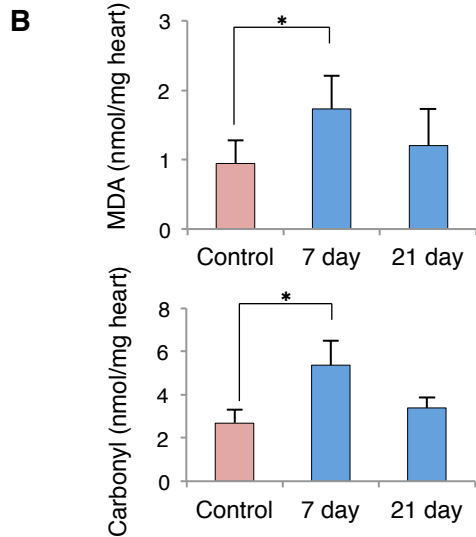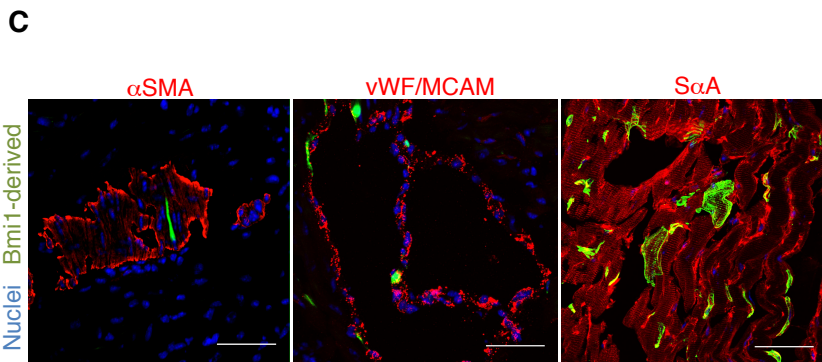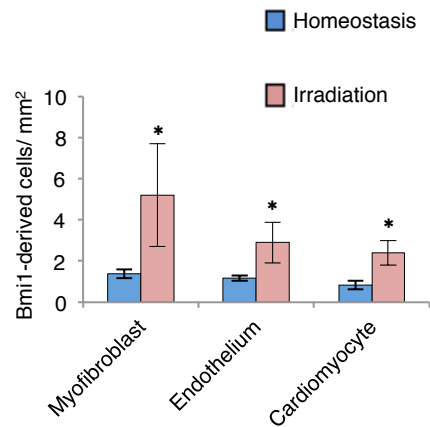

Supplement: 41418_2017_22_MOESM3_ESM.pdf [file 41418_2017_22_MOESM3_ESM.pdf]

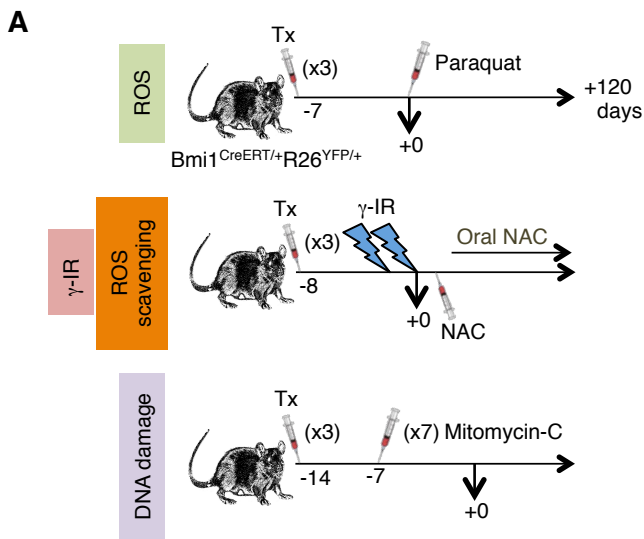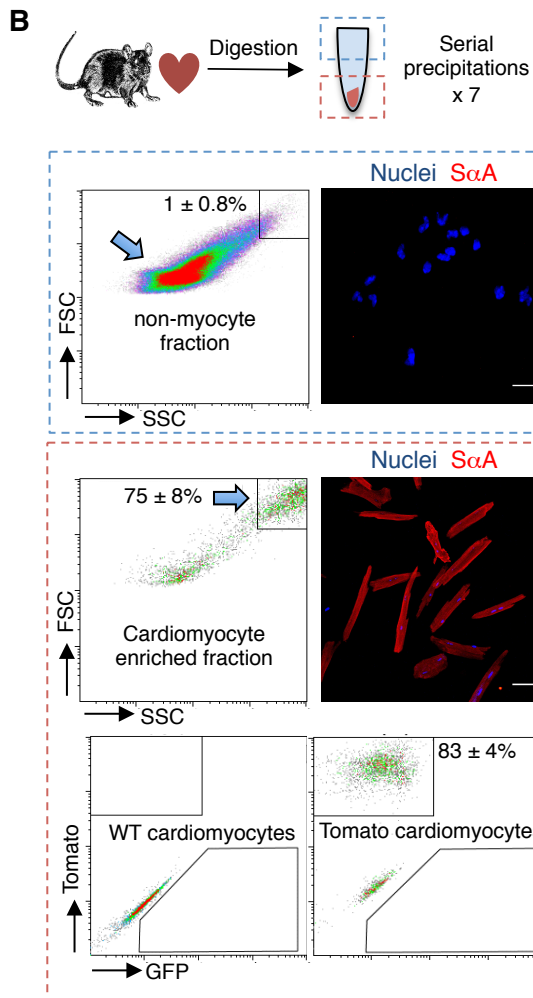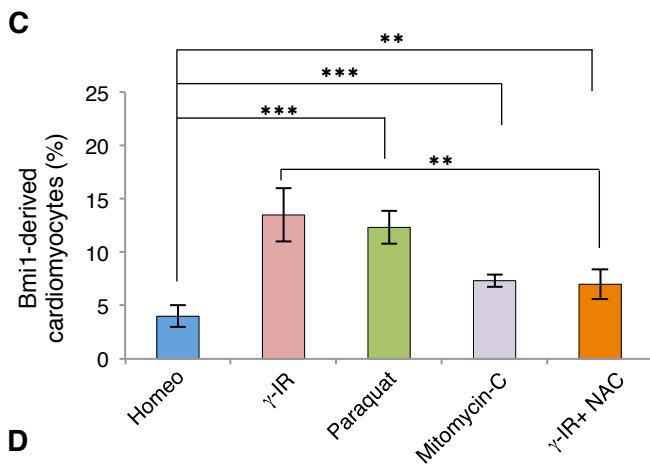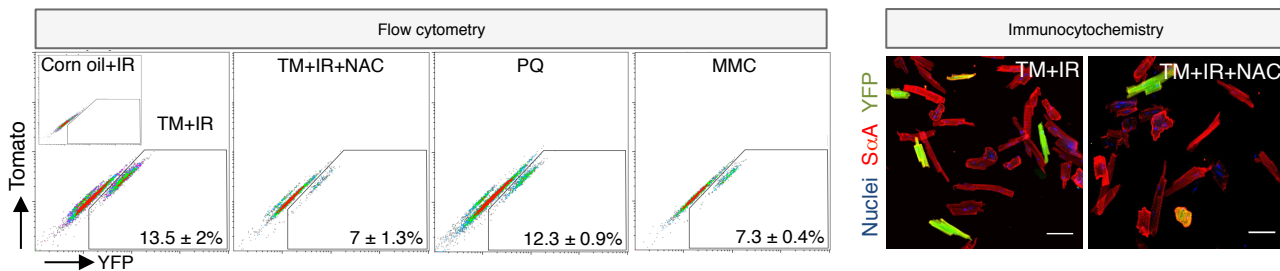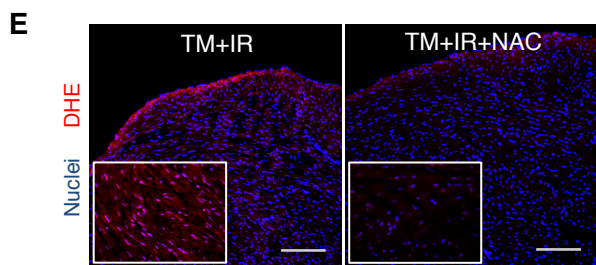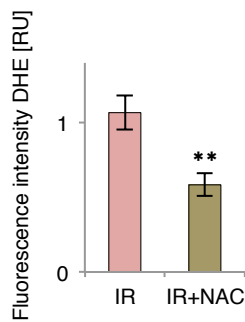

Supplement: 41418_2017_22_MOESM4_ESM.pdf [file 41418_2017_22_MOESM4_ESM.pdf]
